# Supplementary material
Source: PubMed Central journal article supplement (PMC6386699)
Supplement: pnas.1811589116.sapp.pdf [file pnas.1811589116.sapp.pdf]

## Supplementary Information for

### **Regulating the terminator: SraL sRNA interaction prevents the premature transcription termination of *rho* mRNA**

Inês Jesus Silva\*, Susana Barahona, Alex Eyraud, David Lalaouna, Nara Figueroa-Bossi, Eric Massé and Cecília M. Arraiano\*

Inês Jesus Silva  
E-mail: [ijsilva@itqb.unl.pt](mailto:ijsilva@itqb.unl.pt)

Cecília Maria Arraiano  
E-mail: [cecilia@itqb.unl.pt](mailto:cecilia@itqb.unl.pt)

#### **This PDF file includes:**

Figs. S1 to S5  
Table S1 to S3  
Supplementary Materials and Methods  
Supplementary References

#### **Other supplementary materials for this manuscript include the following:**

Dataset S1

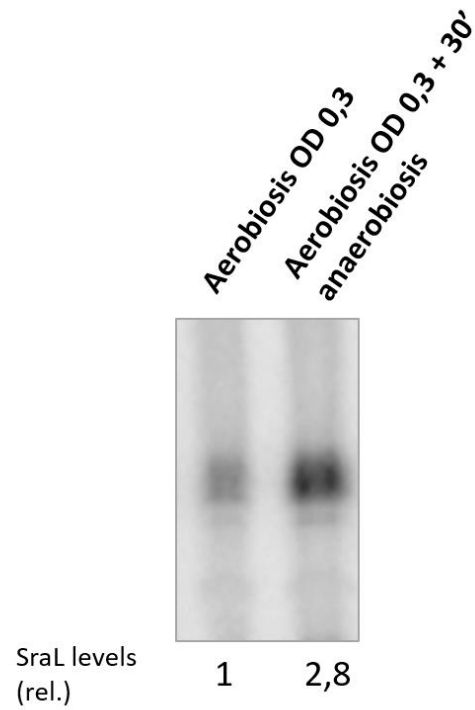

**Fig. S1.** SraL sRNA expression upon anaerobic shock. Total cellular RNA was extracted from *Salmonella* wild-type strain grown in LB at 37°C and 220 rpm to an OD600 of 0.3 and then placed in a filled 50 ml Falcon tube and incubated at 37°C without agitation during 30 min. Fifteen micrograms of total RNA were separated in a 6% PAA / 8.3 M urea to determine the expression level of SraL.

**A) SraLWT / rhoWT**

mfe: -19,2 kcal/mol  
p-value: 9,999939e-01

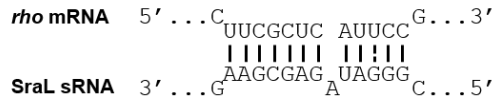**B) SraLWT / rhoMUT**

mfe: -12,4 kcal/mol  
p-value: 9,999939e-01

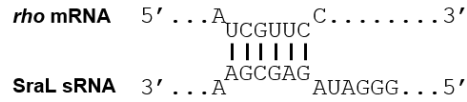**C) SraLMUT / rhoWT**

mfe: -8,4 kcal/mol  
p-value: 9,999939e-01

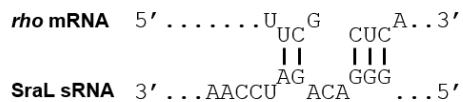**D) SraLMUT / rhoMUT**

mfe: -19,2 kcal/mol  
p-value: 9,999939e-01

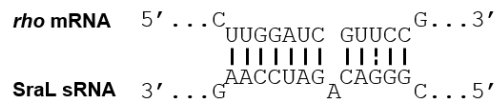

**Fig. S2.** Predicted interaction regions between SraL and *rho* forms. The interaction regions between SraL sRNA and *rho* mRNA were predicted by IntaRNA software (1) and RNA Hybrid (2). Minimum free energies (mfe) and p-values are indicated in the respective figure.

- (A) Predicted interaction between SraLWT and *rho*WT
- (B) Predicted interaction between SraLWT and *rho*MUT
- (C) Predicted interaction between SraLMUT and *rho*WT
- (D) Predicted interaction between SraLMUT and *rho*MUT

```

STM      TTATTCTTAAATTGTCAGGATCTCTGGACGCCCGGCTCGAGTCGTGCTAAGTTAGTATTG      60
STY      TTATTCTTAAATTGTCAGGATCTCTGGACGCCCGGCTCGAGTCGTGCTAAGTTAGTATTG      60
SBO      TTATTCTTAAATTGTCAGGATCTCTGGACGCCCGGCTCGAGTCGTGCTAAGTTAGTATTG      60
SBD      -----CTGGACGCCCGGCTCGAGTCATGCTAAGTTAGTATTG      37
SFL      -----CTGGACGCCCGGCTCGAGTCATGCTAAGTTAGTATTG      37
SDR      -----CTGGACGCCCGGCTCGAGTCATGCTAAGTTAGTATTG      37
ECO      -----CTGGACGCCCGGCTCGAGTCATGCTAAGTTAGTATTG      37
CRT      -----GGATGACTGGACGCCCGGCTCGAGTCGTGCTAAGTTAATGTTG      43
CKO      ---ATTCTAAATTATTCGGATGACTGGACGCCCGGCTCGAGTCGTGCTAAGTTAGTATTG      57
ENT      -----GGATCTCTGGACGCCCGGCTTAGTCTGCTAAGTTACTTATG      43
KPN      -----GGAACTCTGGACGCCCGGAGGAGCTGCTAAGTTAATCCAC      43
          *****          ****          *****          **          *

STM      ACTTCGA--ATTAACATACCTTATTAAGTTTGAATCTGGTTTATCCGTCACCTCCCGT      118
STY      ACTTCGA--ATTAACATACCTTATTAAGTTTGAATCTGGTTTATCCGTCACCTCCCGT      118
SBO      ACTTCGA--ATTAACATACCTTATTAAGTTTGAATCTGGTTTATCCGTCACCTCCCGT      118
SBD      ACTTCGT--ATTAACATACCTTATTAAGTTTGAATCTGTAATTTCCACGCTCCCGT      95
SFL      ACTTCGT--ATTAACATACCTTATTAAGTTTGAATCTGTAATTTCCACGCTCCCGT      95
SDR      ACTTCGT--ATTAACATACCTTATTAAGTTTGAATCTGTAATTTCCACGCTCCCGT      95
ECO      ACTTCGT--ATTAACATACCTTATTAAGTTTGAATCTGTAATTTCCACGCTCCCGT      95
CRT      ACTACGT--AGTAACATACCTTATTAAGTTTGAATCTGTAATTTCCGATACCTCCCGT      101
CKO      ACTTCGT--ATTAACATACCTTATTAAGTTTGAATCTGTTTATCCACGCTCCCGT      115
ENT      ACTTCGATTTAA--ACATACCTTCTC-----GTTCTTGTTTTACCCGATGCTTCCCAT      94
KPN      AGACTTCGTTTAAACATACC---TATTGTTTGAATCTGTTTATCCAAAGCGTCCCGC      100
          *          *****          *          ***          *          **          *          *****

STM      TTTT---CTCGCAGGAGAAGTGGAAGATTCTGG-CTCTTCGCTCATTCGCTCT      171
STY      TTTT---CTCGCACGAGAAGTGGAAGATTCTGG-CTCTTCGCTCATTCGCTCT      171
SBO      TTTT---CTCGCAGGAGAAGTGGAAGATTCTGG-CTCTTCGCTCATTCGCTCT      171
SBD      TTTAT---CTTAAATCGGAAGTGAACAGATTCTGG-CTCTTCACCTCAATCCGCTCT      148
SFL      TTTAT---CTTAAATCGGAAGTGAACAGATTCTGG-CTCTTCACCTCAATCCGCTCT      148
SDR      TTTAT---CTTAAATCGGAAGTGAACAGATTCTGG-CTCTTCACCTCAATCCGCTCT      148
ECO      TTTAT---CTTAAATCGGAAGTGAACAGATTCTGG-CTCTTCACCTCAATCCGCTCT      148
CRT      TTTT---CTCGCGGAGAAGTGGAAGATTCTGG-CTCTTCACCTCAATCCGCTCT      155
CKO      TTTT---CTCGCAGGAGAAGTGAACAGATTCTGG-CTCTTCACCTCAATCCGCTCT      168
ENT      TGTGACACTCACAGTGCCTGAAGTTGC-TAGATTCCGGGCTTTCACCTCAATCCGCTCT      153
KPN      A---G-----ACGATGCGGTGAGGCTAATAATTCGGGCTTATTCACCTCATTCGCTCT      151
          *          *          *          **          **          **          *****

STM      GTCGTTTCAGTTCGCGTACT-TTCCTGTGACCAGACAGCGAACAGACATGAGTTGATAG      230
STY      GTCGTTTCAGTTCGCGTACT-TTCCTGTGACCAGACAGCGAACAGACATGAGTTGATAG      230
SBO      GTCGTTTCAGTTCGCGTACT-TTCCTGTGACCAGACAGCGAACAGACATGAGTTGATAG      230
SBD      GTCGTTTCAGTTCGCGTACT-CTCCTGTGACCAGGACAGCGAAAAGACATGAGTCGATGA      207
SFL      GTCGTTTCAGTTCGCGTACT-CTCCTGTGACCAGGACAGCGAAAAGACATGAGTCGATGA      207
SDR      GTCGTTTCAGTTCGCGTACT-CTCCGTGACCAGGACAGCGAAAAGATATGAGTCGATGA      207
ECO      GTCGTTTCAGTTCGCGTACT-CTCCTGTGACCAGGACAGCGAAAAGACATGAGTCGATGA      207
CRT      GTCGTTTCAGTTCGCGTACT-TTCCTGTGACCAGACAGCGAACAGACATGAATTGATGG      214
CKO      GTCGTTTCAGTTCGCGTACT-TTCCTGTGACCAGACAGCGAACAGACATGAGTTGGTGG      227
ENT      GTCGTTTCAGAGTTCGCTTCTTTCCTGTACCAGACAGCGAACAGACATGAGTTGATGG      213
KPN      GTCGTTTCAGTTCGCGTCT-TTCCTGTGACCAGGCAACGTACAGACAGGATGAAG-      209
          *****          ***          **          **          *          *****          **          *          *          *          *

STM      CCGTAAACAGGCATGGATGACCCCTGCCATACCATTCAACATTAAGTTCGAGATTTACC      290
STY      CCGTAAACAGGCATGGATGACCCCTGCCATACCATTCAACATTAAGTTCGAGATTTACC      290
SBO      CCGTAAACAGGCATGGATGACCCCTGCCATACCATTCAACATTAAGTTCGAGATTTACC      290
SBD      CCGTAAACAGGCATGGATGATCCTGCCATACCATTCAACATTAAGTTCGAGATTTACC      267
SFL      CCGTAAACAGGCATGGATGATCCTGCCATACCATTCAACATTAAGTTCGAGATTTACC      267
SDR      CCGTAAACAGGCATGGATGATCCTGCCATACCATTCAACATTAAGTTCGAGATTTACC      267
ECO      CCGTAAACAGGCATGGATGATCCTGCCATACCATTCAACATTAAGTTCGAGATTTACC      267
CRT      CCGTAAACAGGCATGGATGACCCCTGCCATACCATTCAACATTAAGTTCGAGATTTACC      274
CKO      CCGTAAACAGGCATGGATGATCCTGCCATACCATTCAACATTAAGTTCGAGATTTACC      287
ENT      CCGCAACAGGCATGGATGACCCCTCCATACCATTCAAA-ATTAAGTTCGAGATTTACC      272
KPN      CCGTAAACAGGCATGGATGATCCTGCCATACCATTCAACATTAAGTTCGAGATTTACC      269
          ***          *****          *****          *****          *****

```

STM CCAAGTTTAAAGAACTCACACCATTATGAATCTTACCGAATTAAGAATACGCCGTTTCT 350  
 STY CCAAGTTTAAAGAACTCACACCATTATGAATCTTACCGAATTAAGAATACGCCGTTTCT 350  
 SBO CCAAGTTTAAAGAACTCACACCATTATGAATCTTACCGAATTAAGAATACGCCGTTTCT 350  
 SBD CCAAGTTTAAAGAACTCACACCATTATGAATCTTACCGAATTAAGAATACGCCGTTTCT 327  
 SFL CCAAGTTTAAAGAACTCACACCATTATGAATCTTACCGAATTAAGAATACGCCGTTTCT 327  
 SDR CCAAGTTTAAAGAACTCACACCATTATGAATCTTACCGAATTAAGAATACGCCGTTTCT 327  
 ECO CCAAGTTTAAAGAACTCACACCATTATGAATCTTACCGAATTAAGAATACGCCGTTTCT 327  
 CRT CCAAGTTTAAAGAACTCACACCATTATGAATCTTACCGAATTAAGAATACGCCGTTTCT 334  
 CKO CCAAGTTTAAAGAACTCACACCATTATGAATCTTACCGAATTAAGAATACGCCGTTTCT 347  
 ENT CCGAGTTTAAAGAACCCACACCATTATGAATCTTACCGAATTAAGAATACGCCGTTTCT 332  
 KPN CCGAGTTTAAAGAACCCACACCATTATGAATCTTACCGAATTAAGAATACGCCGTTTCT 329  
 \*\* \* \* \* \* \*

STM GAGCTGATCACTCTCGGCGAAAATATGGGGCTGGAAAACCTGGCCCGTATGCGCAAGCAG 410  
 STY GAGCTGATCACTCTCGGCGAAAATATGGGGCTGGAAAACCTGGCCCGTATGCGCAAGCAG 410  
 SBO GAGCTGATCACTCTCGGCGAAAATATGGGGCTGGAAAACCTGGCCCGTATGCGTAAGCAG 410  
 SBD GAGCTGATCACTCTCGGCGAAAATATGGGGCTGGAAAACCTGGCTCGTATGCGTAAGCAG 387  
 SFL GAGCTGATCACTCTCGGCGAAAATATGGGGCTGGAAAACCTGGCTCGCATGCGTAAGCAG 387  
 SDR GAGCTGATCACTCTCGGCGAAAATATGGGGCTGGAAAACCTGGCTCGTATGCGTAAGCAG 387  
 ECO GAGCTGATCACTCTCGGCGAAAATATGGGGCTGGAAAACCTGGCTCGTATGCGTAAGCAG 387  
 CRT GAGCTGATCACTCTCGGCGAAAATATGGGGCTGGAAAACCTGGCCCGTATGCGCAAGCAG 394  
 CKO GAGCTGATCACTCTCGGCGAAAATATGGGGCTGGAAAACCTGGCTCGTATGCGCAAGCAG 407  
 ENT GAGCTGATCACTCTCGGCGAAAATATGGGGCTGGAAAACCTGGCTCGTATGCGCAAGCAG 392  
 KPN GAGCTGATCACTCTCGGCGAAAATATGGGGCTGGAAAACCTGGCTCGTATGCGTAAGCAG 389  
 \*\* \* \* \* \* \*

STM GACATTATTTTGGCCATCCTGAAGCAGCAGCAAAGAGTGGCGAAGATATCTTTGGCGAC 470  
 STY GACATTATTTTGGCCATCCTGAAGCAGCAGCAAAGAGTGGCGAAGATATCTTTGGCGAC 470  
 SBO GACATTATTTTGGCCATCCTGAAGCAGCAGCAAAGAGTGGCGAAGATATCTTTGGCGAC 470  
 SBD GACATTATTTTGGCCATCCTGAAGCAGCAGCAAAGAGTGGCGAAGATATCTTTGGTGAT 447  
 SFL GACATTATTTTGGCCATCCTGAAGCAGCAGCAAAGAGTGGCGAAGATATCTTTGGTGAT 447  
 SDR GACATTATTTTGGCCATCCTGAAGCAGCAGCAAAGAGTGGCGAAGATATCTTTGGTGAT 447  
 ECO GACATTATTTTGGCCATCCTGAAGCAGCAGCAAAGAGTGGCGAAGATATCTTTGGTGAT 447  
 CRT GACATTATTTTGGCCATCCTGAAGCAGCAGCAAAGAGTGGCGAAGATATCTTTGGTGAC 454  
 CKO GACATTATTTTGGCCATCCTGAAGCAGCAGCAAAGAGTGGCGAAGATATCTTTGGTGAC 467  
 ENT GACATTATTTTGGCCATCCTGAAGCAGCATGCTAAGAGTGGCGAAGATATCTTTGGCGAC 452  
 KPN GATATTATTTTGGCCATCCTCAAGCAGCATTCGAAGAGTGGCGAAGATATCTTTGGCGAC 449  
 \*\* \* \* \* \* \*

STM GGTGTGCTGGAGATATTGCAGGATGGATTTGGTTTCTCCGTTCTGCAGACAGCTCCTAC 530  
 STY GGTGTGCTGGAGATATTGCAGGATGGATTTGGTTTCTCCGTTCTGCAGACAGCTCCTAC 530  
 SBO GGTGTGCTGGAGATATTGCAGGATGGATTTGGTTTCTCCGTTCTGCAGACAGCTCCTAC 530  
 SBD GGCCTACTGGAGATATTGCAGGATGGATTTGGTTTCTCCGTTCTGCAGACAGCTCCTAC 507  
 SFL GGCCTACTGGAGATATTGCAGGATGGATTTGGTTTCTCCGTTCTGCAGACAGCTCCTAC 507  
 SDR GGCCTACTGGAGATATTGCAGGATGGATTTGGTTTCTCCGTTCTGCAGACAGCTCCTAC 507  
 ECO GGCCTACTGGAGATATTGCAGGATGGATTTGGTTTCTCCGTTCTGCAGACAGCTCCTAC 507  
 CRT GGTGTGCTGGAGATATTGCAGGATGGATTTGGTTTCTCCGTTCTGCAGACAGCTCCTAC 514  
 CKO GGTGTGCTGGAGATATTGCAGGATGGATTTGGTTTCTCCGTTCTGCAGACAGCTCCTAC 527  
 ENT GGTGTACTGGAGATATTGCAAGACGGATTTGGTTTCTCCGTTCTGGAGACAGCTCCTAC 512  
 KPN GGCCTACTGGAGATATTGCAGGATGGATTTGGATTCCTCCGTTCTGCAGACAGCTCCTAC 509  
 \*\* \* \* \* \* \*

STM CTCGCCGGTCTGATGATATCTACGTTTCCCCAGCCAAATCCGCCGTTTCAACCTCCGC 590  
 STY CTCGCCGGTCTGATGATATCTACGTTTCCCCAGCCAAATCCGCCGTTTCAACCTCCGC 590  
 SBO CTCGCCGGTCTGATGATATCTACGTTTCCCCAGCCAAATCCGCCGTTTCAACCTCCGC 590  
 SBD CTCGCCGGTCTGATGATATCTACGTTTCCCCAGCCAAATCCGCCGTTTCAACCTCCGC 567  
 SFL CTCGCCGGTCTGATGATATCTACGTTTCCCCAGCCAAATCCGCCGTTTCAACCTCCGC 567  
 SDR CTCGCCGGTCTGATGATATCTACGTTTCCCCAGCCAAATCCGCCGTTTCAACCTCCGC 567  
 ECO CTCGCCGGTCTGATGATATCTACGTTTCCCCAGCCAAATCCGCCGTTTCAACCTCCGC 567  
 CRT CTTGCCGGTCTGATGATATCTACGTTTCTCCAGCCAAATCCGCCGTTTCAACCTCCGC 574  
 CKO CTCGCCGGTCTGATGATATCTACGTTTCTCCAGCCAAATCCGCCGTTTCAACCTCCGC 587  
 ENT CTCGCCGGTCTGATGATATCTACGTTTCCCCAGCCAAATCCGCCGTTTCAACCTCCGT 572  
 KPN CTCGCCGGTCTGATGATATCTACGTTTCCCCAGCCAAATCCGCCGTTTCAACCTCCGC 569  
 \*\* \* \* \* \* \*

STM ACTGGTGAACCATTTCGGTAAGATTCGCCCGCCGAAAGAAGGTGAACGCTATTTTGCG 650  
STY ACTGGTGAACCATTTCGGTAAGATTCGCCCGCCGAAAGAAGGTGAACGCTATTTTGCG 650  
SBO ACTGGTGAACCATTTCGGTAAGATTCGCCCGCCGAAAGAAGGTGAACGCTATTTTGCG 650  
SBD ACTGGTGAACCATCTCTGGTAAGATTCGCCCGCCGAAAGAAGGTGAACGCTATTTTGCG 627  
SFL ACTGGTGAACCATCTCTGGTAAGATTCGCCCGCCGAAAGAAGGTGAACGCTATTTTGCG 627  
SDR ACTGGTGAACCATCTCTGGTAAGATTCGCCCGCCGAAAGAAGGTGAACGCTATTTTGCG 627  
ECO ACTGGTGAACCATCTCTGGTAAGATTCGCCCGCCGAAAGAAGGTGAACGCTATTTTGCG 627  
CRT ACTGGTGAACCATCTCTGGTAAGATTCGCCCGCCGAAAGAAGGTGAACGCTATTTTGCG 634  
CKO ACTGGTGAACCATTTCGGTAAGATTCGCCCGCCGAAAGAAGGTGAACGCTATTTTGCG 647  
ENT ACTGGTGAACCATTTCGGTAAGATTCGGTCTCTCTAAAGAGGTGAACGCTATTTTGCG 632  
KPN ACTGGTGAACCATTTCGGTAAGATTCGGTCTCTCTAAAGAGGTGAACGCTATTTTGCA 629  
\*\*\*\*\* \*\*

STM CTGTTGAAAGTTAACGAAGTTAACTACGACAAACCGGAAAACGCCCGTAACAAAATCCTC 710  
STY CTGTTGAAAGTTAACGAAGTTAACTACGACAAACCGGAAAACGCCCGTAACAAAATCCTC 710  
SBO CTGTTGAAAGTTAACGAAGTTAACTACGACAAACCGGAAAACGCCCGTAACAAAATCCTG 710  
SBD CTGCTGAAAGTTAACGAAGTTAACTTCGACAAACCTGAAAACGCCCGCAACAAAATCCTC 687  
SFL CTGCTGAAAGTTAACGAAGTTAACTTCGACAAACCTGAAAACGCCCGCAACAAAATCCTC 687  
SDR CTGCTGAAAGTTAACGAAGTTAACTTCGACAAACCTGAAAACGCCCGCAACAAAATCCTC 687  
ECO CTGCTGAAAGTTAACGAAGTTAACTTCGACAAACCTGAAAACGCCCGCAACAAAATCCTC 687  
CRT CTGCTGAAAGTTAACGAAGTTAACTACGACAAACCGGAAAACGCCCGTAACAAAATCCTC 694  
CKO CTGTTGAAAGTTAACGAAGTTAACTACGACAAACCTGAAAACGCCCGTAACAAAATCCTC 707  
ENT CTGTTGAAAGTTAACGAAGTTAACTACGATAAACCTGAAAACCTCGCCAAATAGATCCTG 692  
KPN CTGTTGAAAGTTAACGAAGTTAACTACGACAAACCGGAAAACGCCCGTAACAAAGATCCTG 689  
\*\*\* \*\*

STM TTTGAGAACTTAACCCCGCTGCACGCAAACTCTCGTCTGCGTATGGAGCGTGGTAACGGT 770  
STY TTTGAGAACTTAACCCCGCTGCACGCAAACTCTCGTCTGCGTATGGAGCGTGGTAACGGT 770  
SBO TTTGAGAACTTAACCCCGCTGCACGCAAACTCTCGTCTGCGTATGGAGCGTGGTAACGGT 770  
SBD TTTGAGAACTTAACCCCGCTGCACGCAAACTCTCGTCTGCGTATGGAACTGGTGGTAACGGT 747  
SFL TTTGAGAACTTAACCCCGCTGCACGCAAACTCTCGTCTGCGTATGGAACTGGTGGTAACGGT 747  
SDR TTTGAGAACTTAACCCCGCTGCACGCAAACTCTCGTCTGCGTATGGAACTGGTGGTAACGGT 747  
ECO TTTGAGAACTTAACCCCGCTGCACGCAAACTCTCGTCTGCGTATGGAACTGGTGGTAACGGT 747  
CRT TTTGAGAACTTAACCCCGCTGCATGCCAACTCACTCTGCGCATGGAACTGGTGGTAACGGT 754  
CKO TTTGAGAACTTAACCCCGCTGCACGCAAACTCACTCTGCGTATGGAACTGGTGGTAACGGT 767  
ENT TTTGAGAACTTAACCCCGCTGCACGCAAACTCTCGCTGCGCATGGAGCGTGGTAAACGGT 752  
KPN TTTGAGAACTTAACCCCGCTGCACGCAAACTCTCGCTGCGTATGGAACTGGTGGTAACGGT 749  
\*\* \*\*

STM TCTACGAAGACTTAACGGCGCGCGTTCTGGATCTGGCTTCGCCGATCGGTGCGGCCAG 830  
STY TCTACGAAGACTTAACGGCGCGCGTTCTGGATCTGGCTTCGCCGATCGGTGCGGCCAG 830  
SBO TCTACGAAGACTTAACGGCGCGCGTTCTGGATCTGGCTTCGCCGATCGGTGCGGCCAG 830  
SBD TCTACGAAGACTTAACCGCTCGCGTACTGGATCTGGCATCACTATCGGTGCGTGGTTCAG 807  
SFL TCTACTGAAGACTTAACGCTCGCGTACTGGATCTGGCATCACTATCGGTGCGTGGTTCAG 807  
SDR TCTACGAAGACTTAACGCTCGCGTACTGGATCTGGCATCACTATCGGTGCGTGGTTCAG 807  
ECO TCTACTGAAGACTTAACGCTCGCGTACTGGATCTGGCATCACTATCGGTGCGTGGTTCAG 807  
CRT TCTACGAAGACTTAACGGCGCGCGTCTGGATCTGGCTTCGCCAATCGGTGCGGCCAG 814  
CKO TCTACTGAAGACTTAACGGCTCGCGTACTGGATTTGGCTTCGCCGATGGCCGTGGTTCAG 827  
ENT TCTACGAAGACTTACGGCTCGCGTCTGGATCTGGCTTCCTCAATGGTTCGTGGTTCAG 812  
KPN TCTACGAAGACTTAACCGCTCGCGTACTGGATCTGGCTTCGCCGATGGCCGCGGCCAG 809  
\*\*\*\*\* \*\*

STM CGCGGTCTGATTGTCGCGCCGCCGAAAGCGGGTAAAACCATGCTGCTGCAGAACATCGCG 890  
STY CGCGGTCTGATTGTCGCGCCGCCGAAAGCGGGTAAAACCATGCTGCTGCAGAACATCGCG 890  
SBO CGTGGTCTGATTGTTGCGCCGCCGAAAGCGGGTAAAACCATGCTGCTGCAGAAATATCGCG 890  
SBD CGTGGTCTGATTGTTGCCACCGCCGAAAGCGGGTAAAACCATGCTGCTGCAGAACATGCT 867  
SFL CGTGGTCTGATTGTTGCCACCGCCGAAAGCGGGTAAAACCATGCTGCTGCAGAACATGCT 867  
SDR CGTGGTCTGATTGTTGCCACCGCCGAAAGCGGGTAAAACCATGCTGCTGCAGAACATGCT 867  
ECO CGTGGTCTGATTGTTGCCACCGCCGAAAGCGGGTAAAACCATGCTGCTGCAGAACATGCT 867  
CRT CGTGGTCTGATTGTTGCCACCGCCGAAAGCGGGTAAAACCATGCTGCTGCAGAAATATCGCG 874  
CKO CGTGGTCTGATTGTTGCCACCGCCGAAAGCGGGTAAAACCATGCTGTTGCAGAACATCGCG 887  
ENT CGTGGCTGATGTTGCCACCGCCGAAAGCGGTAAAGACCATGCTGCTGCAGAACATCGCG 872  
KPN CGTGGTTTGGATTGTTGCGCCGCCGAAAGCGGGTAAAACCATGCTGCTGCAGAACATCGCG 869  
\*\* \*\*

|     |                                                                                                    |      |
|-----|----------------------------------------------------------------------------------------------------|------|
| STM | CAGAGCATCGCGTATAACCA <del>CCCGACTGCGTGCTGATGGT</del> GCTGCTGATGACGAACGT                            | 950  |
| STY | CAGAGCATCGCGTATAACCA <del>CCAGACTGCGTGCTGATGGT</del> GCTGCTGATGACGAACGT                            | 950  |
| SBO | CAGAGCAT <del>TGCGTACAACCA</del> TCCAGACTGCGTGCTGATGGTCTTGCTGATGACGAACGT                           | 950  |
| SBD | CAGAGCAT <del>TGCTTACAACCA</del> CCCGGATTGTGTGCTGATGGTTCGCTGATCGACGAACGT                           | 927  |
| SFL | CAGAGCAT <del>TGCTTACAACCA</del> CCCGGATTGTGTGCTGATGGTTCGCTGATCGACGAACGT                           | 927  |
| SDR | CAGAGCAT <del>TGCTTACAACCA</del> CCCGGATTGTGTGCTGATGGTTCGCTGATCGACGAACGT                           | 927  |
| ECO | CAGAGCAT <del>TGCTTACAACCA</del> CCCGGATTGTGTGCTGATGGTTCGCTGATCGACGAACGT                           | 927  |
| CRT | CAGAGCATCGCTTACAACCA <del>TCCGGACTGCGTGCTGATGGT</del> GCTGCTGATGACGAACGT                           | 934  |
| CKO | CAGAGCAT <del>TGCTTACAACCA</del> CCCTGACTGCGTACTGATGGTGTGCTGATCGACGAACGT                           | 947  |
| ENT | CAGAGCAT <del>TGCTTACAACCA</del> TCCGTGACTGCGTACTGATGGTTCGCTGATCGATGAGCGT                          | 932  |
| KPN | CAGAGCATCGCTTACAACCA <del>CCCGGACTGCGTGCTGATGGT</del> GCTGCTGATCGACGAACGT                          | 929  |
|     | ***** ** ** ***** ** ** ** * ***** ***** ** ** ** *                                                |      |
| STM | CCGGAAGAAGT <del>GACCCGAGATGCAGCGTCTGGT</del> GAAAGGCGAAGTGGTTGCTTCTACCTTT                         | 1010 |
| STY | CCGGAAGAAGT <del>AACCCGAGATGCAGCGTCTGGT</del> GAAAGGCGAAGTGGTTGCTTCTACCTTT                         | 1010 |
| SBO | CCGGAAGAAGT <del>GACCCGAGATGCAGCGTCTGGT</del> GAAAGGCGAAGTGGTTGCTTCTACCTTT                         | 1010 |
| SBD | CCGGAAGAAGT <del>AACCCGAGATGCAGCGTCTGGT</del> A <del>AAAGG</del> TGAAGTGGTTGCTTCTACCTTT            | 987  |
| SFL | CCGGAAGAAGT <del>AACCCGAGATGCAGCGTCTGGT</del> A <del>AAAGG</del> TGAAGTGGTTGCTTCTACCTTT            | 987  |
| SDR | CCGGAAGAAGT <del>AACCCGAGATGCAGCGTCTGGT</del> A <del>AAAGG</del> TGAAGTGGTTGCTTCTACCTTT            | 987  |
| ECO | CCGGAAGAAGT <del>AACCCGAGATGCAGCGTCTGGT</del> A <del>AAAGG</del> TGAAGTGGTTGCTTCTACCTTT            | 987  |
| CRT | CCGGAAGAAGT <del>GACCCGAGATGCAGCGTCTGGT</del> GAAAGGCGAAGTGGTTCCTTCCACCTTC                         | 994  |
| CKO | CC <del>A</del> GAAAGT <del>AACCCGAAATGCAGCGTCTGGT</del> A <del>AAAGG</del> TGAAGTGGTTGCTTCCACCTTC | 1007 |
| ENT | CC <del>A</del> GAAAGT <del>AACCCGAGATGCAGCGTCTGGT</del> GAAAGGCGAAGTGGTTGCTTCCACCTTC              | 992  |
| KPN | CCGGAAGAAGT <del>GACCCGAGATGCAGCGTCTGGT</del> GAAAGGCGAAGTGGTTGCTTCCACCTTT                         | 989  |
|     | ** ***** ** ** ***** ***** ***** * ** ** *****                                                     |      |
| STM | GACGAACCGGCATCCGCCACGTT <del>CAGGTTGCC</del> GAAATGGTATCGAGAAGGCCAAGCGT                            | 1070 |
| STY | GACGAACCGGCATCCGCCACGTT <del>CAGGTTGCC</del> GAAATGGTATCGAGAAGGCCA <del>AAC</del> CGT              | 1070 |
| SBO | GACGAACCGGCATCCGCCACGTT <del>CAGGTTGCC</del> GAAATGGTATCGAGAAGGCCA <del>AAC</del> CGC              | 1070 |
| SBD | GACGAACCGGCATCTCGCCACGTT <del>CAGGTTGCC</del> GAAATGGTATCGAGAAGGCCA <del>AAC</del> CGC             | 1047 |
| SFL | GACGAACCGGCATCTCGCCACGTT <del>CAGGTTGCC</del> GAAATGGTATCGAGAAGGCCA <del>AAC</del> CGC             | 1047 |
| SDR | GACGAACCGGCATCTCGCCACGTT <del>CAGGTTGCC</del> GAAATGGTATCGAGAAGGCCA <del>AAC</del> CGC             | 1047 |
| ECO | GACGAACCGGCATCTCGCCACGTT <del>CAGGTTGCC</del> GAAATGGTATCGAGAAGGCCA <del>AAC</del> CGC             | 1047 |
| CRT | GACGAACCGGCATCCGTCACGTT <del>CAGGTTAGCT</del> GAAATGGTATCGAGAAGGCCA <del>AAC</del> CGT             | 1054 |
| CKO | GACGAACCGGCATCCGTCACGTT <del>CAGGTTAGCT</del> GAAATGGTATCGAGAAGGCCA <del>AAC</del> CGT             | 1067 |
| ENT | GATGAGCCAGCCTCTCGCCACGTT <del>CAGGTTGCT</del> GAAATGGTATCGAGAAGGCCA <del>AAC</del> CGT             | 1052 |
| KPN | GACGAGCCGGCATCCGCCACGTT <del>CAGGTTGCC</del> GAGATGGTATCGAGAAGGCCA <del>AAC</del> CGT              | 1049 |
|     | ** ** ** ** ** ** ** ** ** ** ** ** ***** ***** ** ** ***** ** ***** ** ** ** *                    |      |
| STM | CTGGTTGAA <del>CACAAGAAAGACGTTATCAT</del> CCTGCTCGACTCCATCACCCTGCTGGCGGC                           | 1130 |
| STY | CTGGTTGAA <del>CACAAGAAAGACGTTATCAT</del> CCTGCTCGACTCCATCACCCTGCTGGCGGT                           | 1130 |
| SBO | CTGGTTGAA <del>CACA</del> AAAAGACGTTATCATCCTGCTCGACTCTAT <del>TAC</del> ACGCTGCTGGCGGT             | 1130 |
| SBD | CTGGTTGAA <del>CACAAGAAAGACGTTATCAT</del> TCTGCTCGACTCCATCACTCGTCTGGCGGC                           | 1107 |
| SFL | CTGGTTGAA <del>CACAAGAAAGACGTTATCAT</del> TCTGCTCGACTCCATCACTCGTCTGGCGGC                           | 1107 |
| SDR | CTGGTTGAA <del>CACAAGAAAGACGTTATCAT</del> TCTGCTCGACTCCATCACTCGTCTGGCGGC                           | 1107 |
| ECO | CTGGTTGAA <del>CACAAGAAAGACGTTATCAT</del> TCTGCTCGACTCCATCACTCGTCTGGCGGC                           | 1107 |
| CRT | CTGGTTGAA <del>CATAAAGAAAGACGTTATCAT</del> TCTGCTCGACTCCATCACCCTGCTGGCGGT                          | 1114 |
| CKO | CTGGTTGAA <del>CACA</del> AAAAGACGTTATCATCCTGCTCGACTCCATCACTCGTCTGGCTCGC                           | 1127 |
| ENT | CTGGT <del>CGAG</del> CACAAGAAAGACGTTAT <del>TAT</del> TCTGCTCGACTCCATCACTCGTCTGGCGGT              | 1112 |
| KPN | CTGGTTGAA <del>CACAAGAAAGACGTTATCAT</del> CCTGCTCGACTCCAT <del>TACT</del> CGTCTGGCGGA              | 1109 |
|     | ***** ** ** ** ***** ***** ***** ** ** ***** ***** ** *                                            |      |
| STM | GCCTACAACACCGTGGT <del>GCCGGCTTCCGGTAAAGT</del> ATTGACCGGTGGTGTGGACGCTAAC                          | 1190 |
| STY | GCCTACAACACCGTGGT <del>GCCGGCTTCCGGTAAAGT</del> ACTGACCGGTGGTGTGGATGCTAAC                          | 1190 |
| SBO | GCCTACAACACCGTGGT <del>GCCAGCTTCTGGTAAAGT</del> GCTGACTGGTGGTGTGGATGCCAAC                          | 1190 |
| SBD | GCTTACAACACTGTTGTTCCGGCGTCAGGTA <del>AAAGT</del> GTTGACCGGTGGTGTGGACGCCAAT                         | 1167 |
| SFL | GCTTACAACACTGTTGTTCCGGCGTCAGGTA <del>AAAGT</del> GTTGACCGGTGGTGTGGACGCCAAT                         | 1167 |
| SDR | GCTTACAACACCGTGGT <del>TCCGGCGTCAGGTA</del> AAAGTGTTGACTGGTGGTGTGGACGCCAAT                         | 1167 |
| ECO | GCTTACAACACCGTGGT <del>TCCGGCGTCAGGTA</del> AAAGTGTTGACCGGTGGTGTGGATGCCAAC                         | 1167 |
| CRT | GCGTATAACACCGTGGT <del>TCCGGCTTCCGGTAAAGT</del> GTTGACCGGTGGTGTGGATGCCAAC                          | 1174 |
| CKO | GCCTACAACACCGTGGT <del>GCCGGCTTCTGGTAAAGT</del> CCTGACCGGTGGTGTGGACGCCAAC                          | 1187 |
| ENT | GCTTACAACACCGTAGTT <del>CCTGCTTCCGGTAAAGT</del> ACTGACCGGTGGTGTGGATGCCAAC                          | 1172 |
| KPN | GCCTACAACACCGTGGT <del>ACC</del> GGCTTCTGGTAAAGTCTGACCGGTGGTGTGGACGCCAAC                           | 1169 |
|     | ** ** ***** ** ** ** ***** ***** ***** ***** ***** ** ** *                                         |      |

STM GCCCTGCATCGTCCGAAACGCTTTCTTCGGCGCGGCGTAACGTGGAAGAGGGCGGTAGC 1250  
STY GCCCTGCATCGTCCGAAACGCTTTCTTCGGCGCGGCGTAACGTGGAAGAGGGCGGTAGC 1250  
SBO GCCCTGCATCGTCCGAAACGCTTTCTTCGGTGC CGGCGTAACGTGGAAGAGGGCGGCAGC 1250  
SBD GCCCTGCATCGTCCGAAACGCTTTCTTCGGTGC CGGCGTAACGTGGAAGAGGGCGGCAGC 1227  
SFL GCCCTGCATCGTCCGAAACGCTTTCTTCGGTGC CGGCGTAACGTGGAAGAGGGCGGCAGC 1227  
SDR GCCCTGCATCGTCCGAAACGCTTTCTTCGGTGC CGGCGTAACGTGGAAGAGGGCGGCAGC 1227  
ECO GCCCTGCATCGTCCGAAACGCTTTCTTCGGTGC CGGCGTAACGTGGAAGAGGGCGGCAGC 1227  
CRT GCCCTGCACCGTCCGAAACGCTTTCTTCGGCGCGGCGTAACGTGGAAGAGGGCGGTAGC 1234  
CKO GCCCTGCACCGTCCGAAACGCTTTCTTCGGCGCGGCGTAACGTGGAAGAGGGCGGCAGC 1247  
ENT GCATACACCGTCCGAAACGCTTTCTTCGGTGC CGGCGTAACGTGGAAGAGGGAGGAACG 1232  
KPN GCCCTGCACCGTCCGAAACGCTTTCTTCGGTGC CGGCGTAACGTGGAAGAGGGCGGCAGC 1229  
\*\* \* \* \* \* \* \*\* \* \* \* \* \* \*\* \* \* \* \* \* \*\* \* \* \* \* \* \*\* \* \* \* \* \* \*\* \* \* \* \* \*

STM CTGACTATCATCGCGACGGCGCTAATCGATACCGGTTCCAAGATGGACGAAGTTATCTAC 1310  
STY CTGACTATCATCGCGACGGCGCTAATCGATACCGGTTCCAAGATGGACGAAGTTATCTAC 1310  
SBO CTGACTATCATCGCGACGGCGTTGATCGACACCGGCTCCAAGATGGATGAAGTTATCTAC 1310  
SBD CTGACCATATCGCGACGGCGCTTATCGATACCGGTTCTAAAATGGACGAAGTTATTTAC 1287  
SFL CTGACCATATCGCGACGGCGCTTATCGATACCGGTTCTAAAATGGACGAAGTTATTTAC 1287  
SDR CTGACCATATCGCGACGGCGCTTATCGATACCGGTTCTAAAATGGACGAAGTTATTTAC 1287  
ECO CTGACCATATCGCGACGGCGCTTATCGATACCGGTTCTAAAATGGACGAAGTTATCTAC 1287  
CRT CTGACCATCATCGCGACCGCGCTTATCGATACCGGCTCCAAGATGGACGAGTTATCTAC 1294  
CKO CTGACCATATCGCAACGGCGCTGATCGACACCGGTTCTAAGATGGATGAAGTATCTAC 1307  
ENT CTGACGATATCGCAACCGCTCTGGTTGATACCGGCTCTAAAATGGATGAAGTTATCTAC 1292  
KPN CTGACCATCATTCGCGACGGCGCTGATTCGACACCGGCTCCAATGGACGAAGTATCTAC 1289  
\*\*\*\*\* \*\* \* \* \* \* \* \* \* \* \* \* \* \* \* \* \* \* \* \* \* \* \* \* \* \* \* \* \* \* \* \* \* \* \*

STM GAAGAGTTTAAAGGCACCGTAACATGGAGCTGCATCTCTCGCGTAAGATCGCTGAAAAA 1370  
STY GAAGAGTTTAAAGGCACCGTAACATGGAGCTGCATCTCTCGCGTAAGATCGCTGAAAAA 1370  
SBO GAAGAGTTTAAAGGTACAGGCAACATGGAACCTGCACCTCTCTCGTAAGATCGCTGAAAAA 1370  
SBD GAAGAGTTTAAAGGTACAGGCAACATGGAACCTGCACCTCTCTCGTAAGATCGCTGAAAAA 1347  
SFL GAAGAGTTTAAAGGTACAGGCAACATGGAACCTGCACCTCTCTCGTAAGATCGCTGAAAAA 1347  
SDR GAAGAGTTTAAAGGTACAGGCAACATGGAACCTGCACCTCTCTCGTAAGATCGCTGAAAAA 1347  
ECO GAAGAGTTTAAAGGTACAGGCAACATGGAACCTGCACCTCTCTCGTAAGATCGCTGAAAAA 1347  
CRT GAAGAGTTCAAGGCGACCGTAACATGGAACCTGCACCTTCCCGTAAGATCGCGGAAAAA 1354  
CKO GAAGAGTTTAAAGGCACCGTAACATGGAGCTGCACCTCTCCCGTAAGATCGCTGAAAAA 1367  
ENT GAAGAGTTTAAAGGCACCGTAACATGGAGCTGCACCTGGCACGTAATAATCGCCGAGAAAG 1352  
KPN GAAGAGTTTAAAGGCACCGTAACATGGAGCTGCACCTCTCTCGTAAGATGCGGAAAAA 1349  
\*\*\*\*\* \*\* \* \* \* \* \* \* \* \* \* \* \* \* \* \* \* \* \* \* \* \* \* \* \* \* \* \* \* \* \* \* \* \* \*

STM CGTGTCTTCCCGGTATCGACTACAACCGTTCCGGTACCGGTAAGAAGAGCTGCTCACC 1430  
STY CGTGTCTTCCCGGTATCGACTACAACCGTTCCGGTACCGGTAAGAAGAGCTGCTCACC 1430  
SBO CGCGTCTTCCCGGTATCGACTACAACCGTTCCGGTACCGGTAAGAAGAGCTGCTTACC 1430  
SBD CGCGTCTTCCCGGTATCGACTACAACCGTTCCGGTACCGGTAAGAAGAGCTGCTCACC 1407  
SFL CGCGTCTTCCCGGTATCGACTACAACCGTTCCGGTACCGGTAAGAAGAGCTGCTCACC 1407  
SDR CGCGTCTTCCCGGTATCGACTACAACCGTTCCGGTACCGGTAAGAAGAGCTGCTCACC 1407  
ECO CGCGTCTTCCCGGTATCGACTACAACCGTTCCGGTACCGGTAAGAAGAGCTGCTCACC 1407  
CRT CGCGTCTTCCCGGCATTGACTACAACCGTTCCGGTACCGGTAAGAAGAGCTGCTTACC 1414  
CKO CGCGTCTTCCCGGTATCGACTACAACCGTTCCGGTACCGGTAAGAAGAGCTGCTCACC 1427  
ENT CGCGTCTTCCCGGATTGATTACAACCGTTCCAGGACCGGTAAGAAGAGCTGCTCACC 1412  
KPN CGCGTCTTCCCGGTATCGATTACAACCGTTCCGGCACCGGTAAGAAGAAGCTGCTCACC 1409  
\*\* \* \* \* \* \* \*\* \* \* \* \* \* \*\* \* \* \* \* \* \*\* \* \* \* \* \* \*\* \* \* \* \* \* \*\* \* \* \* \* \*

STM ACTCAGGAAGAGCTGCAGAAAATGTGGATCCTGCGTAAAATCATCCATCCGATGGGTGAA 1490  
STY ACTCAGGAAGAGCTGCAGAAAATGTGGATCCTGCGTAAAATCATCCATCCGATGGGTGAG 1490  
SBO ACTCAGGAAGAGCTGCAGAAAATGTGGATCCTACGTAAAATCATTCATCCATGGGTGAA 1490  
SBD ACTCAGGAAGAAGCTGCAGAAAATGTGGATCCTGCGCAAAAATCATTCACCCGATGGGCGAA 1467  
SFL ACTCAGGAAGAAGCTGCAGAAAATGTGGATCCTGCGCAAAAATCATTCACCCGATGGGCGAA 1467  
SDR ACTCAGGAAGAAGCTGCAGAAAATGTGGATCCTGCGCAAAAATCATTCACCCGATGGGCGAA 1467  
ECO ACTCAGGAAGAAGCTGCAGAAAATGTGGATCCTGCGCAAAAATCATTCACCCGATGGGCGAA 1467  
CRT ACTCAGGAAGAAGCTGCAGAAAATGTGGATCCTGCGTAAAGATCATTCACCAATGGGCGAA 1474  
CKO ACTCAGGAAGAAGCTACAGAAAATGTGGATCCTGCGCAAAAATCATCCATCCGATGGGTGAA 1487  
ENT ACTCAGGAAGAGCTGCAGAAAATGTGGATCCTGCGTAAAGATCATTCACCCGATGGGCGAA 1472  
KPN ACTCAGGAAGAGCTGCAGAAAATGTGGATCCTGCGCAAAAATCATTCATCCGATGGGTGAG 1469  
\*\*\*\*\* \*\* \* \* \* \* \* \* \* \* \* \* \* \* \* \* \* \* \* \* \* \* \* \* \* \* \* \* \* \* \* \* \* \* \*



|     |                                                                                                   |      |
|-----|---------------------------------------------------------------------------------------------------|------|
| STM | <b>ATTGACGC</b> GATGGAAATTCCTCATTAAC <b>AAACTGGCGATGACCAA</b> AACT <b>AATGACGACTTT</b>            | 1550 |
| STY | <b>ATTGACGC</b> GATGGAAATTCCTCATTAAC <b>AAACTGGCGATGACCAA</b> AACT <b>AATGACGACTTT</b>            | 1550 |
| SBO | <b>ATCGACGC</b> AAATGGAAATTCCTCAT <b>CAATAA</b> ATGGCGATGACCAA <b>ACC</b> AATGATGACTTC            | 1550 |
| SBD | <b>ATCGATGC</b> AAATGGAAATTCCTCATTA <b>ATAA</b> CTGGCCATGACCAA <b>AGCC</b> AATGACGATTTTC          | 1527 |
| SFL | <b>ATCGATGC</b> AAATGGAAATTCCTCATTA <b>ATAA</b> CTGGCCATGACCAA <b>AGCC</b> AATGACGATTTTC          | 1527 |
| SDR | <b>ATCGATGC</b> AAATGGAAATTCCTCATTA <b>ATAA</b> CTGGCAATGACCAA <b>AGCC</b> AATGACGATTTTC          | 1527 |
| ECO | <b>ATCGATGC</b> AAATGGAAATTCCTCATTA <b>ATAA</b> CTGGCAATGACCAA <b>AGCC</b> AATGACGATTTTC          | 1527 |
| CRT | <b>ATCGACGC</b> GATGGAAATTTCTCATTA <b>ACAAG</b> CTGGCAATGACCAA <b>AGCC</b> AA <b>CGACGACTTC</b>   | 1534 |
| CKO | <b>ATCGACGC</b> GATGGAAATTCCTCATTA <b>ACAAG</b> CTGGCAATGACCAA <b>AGCC</b> AA <b>CGACGACTTC</b>   | 1547 |
| ENT | <b>ATCGACGC</b> AAATGGAAATTCCTCAT <b>CAATAA</b> AGCTGGCAATGAC <b>AAAGCC</b> AA <b>CGATGATTTTC</b> | 1532 |
| KPN | <b>ATCGATGC</b> AAATGGAAATTCCTCATTA <b>ACAAG</b> CTGGCGATGACCAA <b>AGCC</b> AATGATGACTTC          | 1529 |
|     | ** * * * * * * * * * * * * * * * * * * * * * * * * * * * * * * * * * * *                          |      |
| STM | <b>TTCGAGATGATGAA</b> CGCTCATAA                                                                   | 1574 |
| STY | <b>TTCGAGATGATGAA</b> CGCTCATAA                                                                   | 1574 |
| SBO | <b>TTT</b> GAGATGATGAA <b>CGCTCATAA</b>                                                           | 1574 |
| SBD | <b>TTCGAAATGATGAA</b> CGCTCATAA                                                                   | 1551 |
| SFL | <b>TTCGAAATGATGAA</b> CGCTCATAA                                                                   | 1551 |
| SDR | <b>TTCGAAATGATGAA</b> CGCTCATAA                                                                   | 1551 |
| ECO | <b>TTCGAAATGATGAA</b> CGCTCATAA                                                                   | 1551 |
| CRT | <b>TTCGACATGATGAA</b> CGTTCGTAA                                                                   | 1558 |
| CKO | <b>TTCGACATGATGAA</b> CGTTCGTAA                                                                   | 1571 |
| ENT | <b>TTCGACATGATGAA</b> CGCTCGTAA                                                                   | 1556 |
| KPN | <b>TTCGATATGATGAA</b> CGCTCGTAA                                                                   | 1553 |
|     | ** * * * * * * * * * * * * * * * * * * * * * * * * * * * * * * * * * *                            |      |

**Fig. S3.** Alignment of *rho* genes including the upstream promoter region in several enterobacteria. All nucleotides are colored regarding their degree of conservation (red: high conservation; blue: partial conservation; black: little or no conservation). The asterisks (\*) below the sequences are indicating the nucleotides conserved between all the species analyzed. *rho* coding sequence is given in bold letters. The *rho* interaction region with SraL is also indicated in yellow. STM: *Salmonella enterica* serovar Typhimurium; STY: *Salmonella enterica* serovar Typhi; SBO: *Salmonella bongori*; SBD: *Shigella boydii*; SFL: *Shigella flexneri*; SDR: *Shigella dysenteriae*; ECO: *Escherichia coli*; CRT: *Citrobacter rodentium*; CKO: *Citrobacter koseri*; ENT: *Enterobacter*; KPN: *Klebsiella pneumoniae*

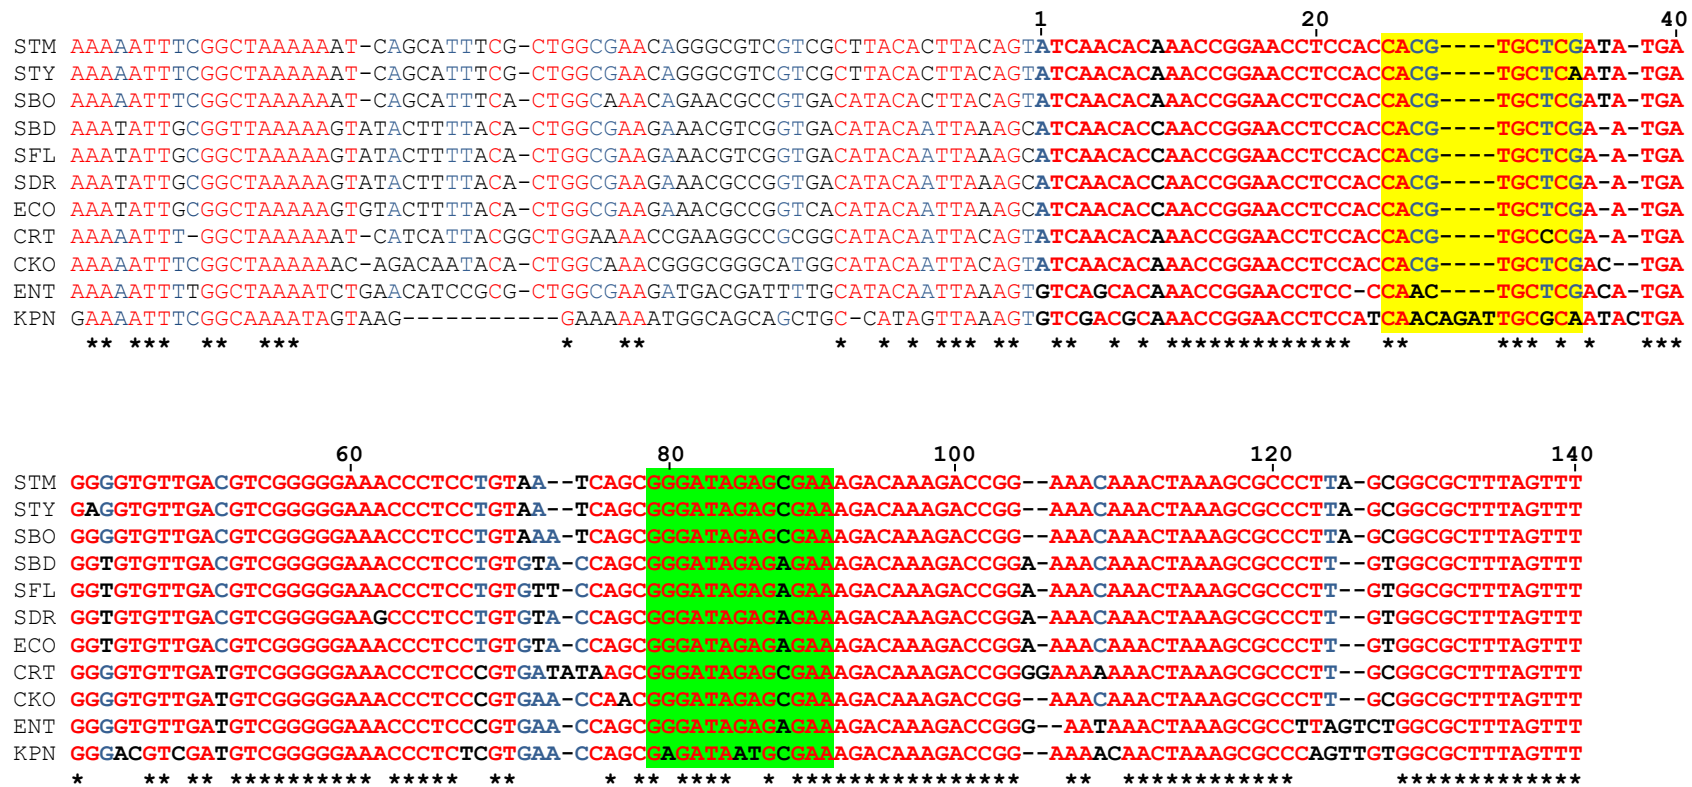

**Fig. S4.** Alignment of *sraL* genes including the upstream promoter region in several enterobacteria. All nucleotides are colored regarding their degree of conservation (red: high conservation; blue: partial conservation; black: little or no conservation). The asterisks (\*) below the sequences are indicating the nucleotides conserved between all the species analyzed. The SraL interaction regions with *tig* mRNA and *rho* mRNA are also indicated in yellow and green, respectively. STM: *Salmonella enterica* serovar Typhimurium; STY: *Salmonella enterica* serovar Typhi; SBO: *Salmonella bongori*; SBD: *Shigella boydii*; SFL: *Shigella flexneri*; SDR: *Shigella dysenteriae*; ECO: *Escherichia coli*; CRT: *Citrobacter rodentium*; CKO: *Citrobacter koseri*; ENT: *Enterobacter*; KPN: *Klebsiella pneumoniae*

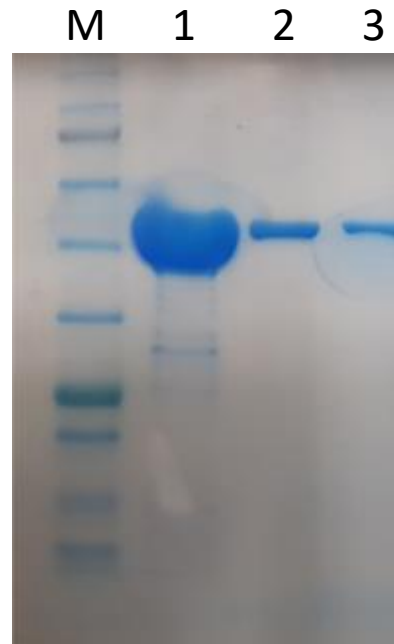

- 1 – Rho protein after purification (17,2  $\mu\text{M}$ )
- 2 – Rho protein in Buffer 2 without glycerol (2,8  $\mu\text{M}$ )
- 3 – Rho protein in Buffer 2 (1,4  $\mu\text{M}$ )

**Fig. S5.** SDS-PAGE analysis of purified Rho protein.

Protein samples were visualized by BlueSafe (Nzytech). Molecular weight marker (NZYBlue Protein Marker - Nzytech) is shown on the left side of the image. Purified recombinant *Salmonella* Rho (~42,7 kDa) after purification and after buffer exchange (without and with 50% glycerol) were separated on a 10 % polyacrylamide gel.

**Table S1. List of Oligonucleotides used in this work**

| <b>Oligo</b> | <b>Sequence 5' to 3'</b>                                                  |
|--------------|---------------------------------------------------------------------------|
| pIS-021      | ATCAACACAAACCGGAAC                                                        |
| pIS-022      | <b>GTTTTTTTTTTAATACGACTCACTATAGGGAGGTAAGGGCGCTTTAGTTG</b>                 |
| pIS-023      | CTACGGCGTTTCACTTCTGAGTTC                                                  |
| pIS-024      | ACGGCTACCTTGTTACGACTT                                                     |
| pIS-027      | TGGTAAGGCAACGCCAGCTC                                                      |
| pIS-030      | GATGAGCTGGACGGTTGTATC                                                     |
| pIS-041      | AGGGCGCTGTATGGTCAGGCGTCTGTCAATTCGACGAATGATTAAGGTATCAGTGTAGGCTGGAGCTGCTTC  |
| pIS-042      | TCCTGACAATTTAAGAATAACGTAAGGACAACAGACGCCACGAACTGCCGGTCCATATGAATATCCTCCTTAG |
| pIS-043      | AAACGGCGAAGTGGCGGCAAC                                                     |
| pIS-044      | GTGGAAAGATTCTGGCTCTTGGATCGTTCCGCTTGTCGTTTCA                               |
| pIS-045      | TGAAACGACAAGACGGAACGATCCAAGAGCCAGGAATCTTCCAC                              |
| pIS-046      | TCGCCGAGAGTGATCAGCTCAG                                                    |
| pIS-047      | CCCTCCTGTAATCAGCGGGACAGATCCAAAGACAAAGACCGGAAA                             |
| pIS-048      | TTCCGGTCTTTGTCTTTGGATCTGTCCCCTGATTACAGGAGGG                               |
| pIS-049      | <b>GTTTTTTTTTTAATACGACTCACTATAGTTCACCAGACGCTGCATCTC</b>                   |
| pIS-050      | CGTTCTGGATCTGGCTTCGC                                                      |
| pIS-051      | CGATGCTCTGCGCGATGTTT                                                      |
| pIS-052      | ATCACTCTCGGCGAAAGTATGG                                                    |
| pIS-053      | TCCATCCTGCAATATCTCCAGC                                                    |
| pIS-054      | CTCGCACGAGAAGTGGAAAG                                                      |
| pIS-055      | CGCTGTCTGGTCACAGGAAAG                                                     |
| pIS-056      | TAAGCGTCGCTGCCG                                                           |
| pIS-057      | AAAGAAAGCGTAATAGCTCACTGGTC                                                |
| pIS-058      | <b>GTTTTTTCATATGAATCTTACCGAATTAAAG</b>                                    |

|         |                                                                   |
|---------|-------------------------------------------------------------------|
| pIS-059 | GTTTTTTAAGCTTGCGCATATCCCGATGACCAGTTT                              |
| pIS-060 | GTCTAACCTATAGGATACTTACAGCCGACTTCGAATTAACATACCTTATTAAG             |
| pIS-061 | TTACCACGCTCCATACGCAGACGAGAGTTTGCG                                 |
| pIS-062 | TTATCAAAAAGAGTATTGACTTAAAGTCTAACCTATAGGATACTTACAGCC               |
| pIS-063 | GTTTTTTTTAATACGACTCACTATAGGATCAACACAAACCGGAACCTC                  |
| pIS-064 | AAAATAAGCGCCGCTAAG                                                |
| pIS-065 | GGAATGAGCGAA                                                      |
| pIS-066 | GTTTTTTTTAATACGACTCACTATAGGACATCAGATTCCTGGTGTAACG                 |
| pIS-067 | AAAAAATCCCGGCCCTACGGGTC                                           |
| pIS-068 | CAACGGATAACGTAGCAATTACTGATGGCGTCATTATAATGTGTAGGCTGGAGCTGCTTC      |
| pIS-069 | CGGTTTATCAGCGCGAGGTTTACGTTACGCGCCTTCTTTACGGTCCATATGAATATCCTCCTTAG |
| pIS-070 | GTCGCACAGCTTGAAACC                                                |
| pIS-071 | CTGCGCGTACAATCAAAGAC                                              |
| pIS-072 | GTTTTTCTAGATGACGCCTGTTTCATGCCTGCTG                                |
| pIS-073 | GTTTTTTAAGCTTATGCAAGCAGGCCAGCTAAC                                 |
| EM1724  | GACTGAGAATTCCAGACCCTGATGGTGTCTG                                   |
| EM2883  | CCGCTCGAGCGTACACCATCAGGGTACGTTTT                                  |
| EM2884  | CAGTTGAATTCATCAACACAAACCGGAACCTC                                  |
| EM2885  | CCCAAGCTTCACTCGGCCATCGGGCTG                                       |
| EM2886  | CCGCTCGAGATCAACACAAACCGGAACCTC                                    |
| EM2888  | CCTCGAGCCCGGGGAGCTCG                                              |
| EM2889  | AATTCGAGCTCCCCGGGCTCGAGGACGT                                      |

**Table S2. List of strains used in this work**

| <b>Strain</b>                     | <b>Relevant Markers / Genotype</b>                                                                                           | <b>Source/Reference</b> |
|-----------------------------------|------------------------------------------------------------------------------------------------------------------------------|-------------------------|
| <i>S. Typhimurium</i> ,<br>SL1344 | Str <sup>R</sup> <i>hisG rpsL xyl</i>                                                                                        | (3)                     |
| <i>E. coli</i> DH5                | <i>recA1 endA1 gyrA96 thi-hsdR17 supE44 relA1 ΔlacZYA-arg</i> FU169<br>f80dLacZDM15                                          | New England<br>Biolabs  |
| BL21(DE3)                         | <i>fhuA2 [lon] ompT gal (λ DE3) [dcm] ΔhsdS</i><br><i>λ DE3 = λ sBamHI ΔEcoRI-B int::(lacI::PlacUV5::T7 gene1) i21 Δnin5</i> | New England<br>Biolabs  |
| CMA-651                           | SL1344 <i>sraL</i> ( $\Delta$ <i>sraL</i> ::Cm <sup>R</sup> )                                                                | (4)                     |
| CMA-654                           | SL1344 [ <i>sraL</i> - <i>STM4267</i> ]IG::Cm <sup>R</sup>                                                                   | (4)                     |
| CMA-659                           | SL1344 [ <i>trxA-rho</i> ]IG::Cm <sup>R</sup>                                                                                | This study              |
| CMA-660                           | SL1344 [ <i>trxA-rho</i> ]IG::Cm <sup>R</sup> <i>rho</i> <sub>C98G/C100A/A103G</sub>                                         | This study              |
| CMA-661                           | SL1344 [ <i>sraL</i> - <i>STM4267</i> ]IG::Cm <sup>R</sup> <i>sraL</i> <sub>U83C/G87U/G89C</sub>                             | This study              |
| CMA-662                           | SL1344 <i>sraL</i> <sub>U83C/G87U/G89C</sub>                                                                                 | This study              |
| CMA-663                           | SL1344 [ <i>trxA-rho</i> ]IG::Cm <sup>R</sup> <i>rho</i> <sub>C98G/C100A/A103G</sub> <i>sraL</i> <sub>U83C/G87U/G89C</sub>   | This study              |
| CMA-664                           | SL1344 <i>proQ</i> ( $\Delta$ <i>proQ</i> ::Cm <sup>R</sup> )                                                                | This study              |
| CMA-665                           | SL1344 <i>sraL</i> ( $\Delta$ <i>sraL</i> )                                                                                  | This study              |
| CMA-666                           | SL1344 <i>sraL proQ</i> ( $\Delta$ <i>sraL</i> $\Delta$ <i>proQ</i> ::Cm <sup>R</sup> )                                      | This study              |
| JVS-0255                          | SL1344 $\Delta$ <i>hfq</i> ::Cm <sup>R</sup>                                                                                 | (5)                     |
| MA11598                           | LT2 <i>pgaA1</i> ( $\Delta$ )- <i>lacZY aph</i> $\Delta$ <i>csrA</i> ::cat <i>sup2</i>                                       | (6)                     |

Table S3 - List of plasmids used in this work

| Plasmid                    | Comments                                                                                            | Origin/Marker                     | Source / Reference |
|----------------------------|-----------------------------------------------------------------------------------------------------|-----------------------------------|--------------------|
| pKD3                       | Template for mutants construction; carries chloramphenicol-resistance cassette                      | oriR $\gamma$ /Amp <sup>R</sup>   | (7)                |
| pKD46                      | Temperature-sensitive lambda-red recombinase expression plasmid                                     | oriR101/Amp <sup>R</sup>          | (7)                |
| pCP20                      | Temperature-sensitive FLP recombinase expression plasmid                                            | Amp <sup>R</sup> /Cm <sup>R</sup> | (7)                |
| pET-28a                    | Inducible expression vector, N-terminal His Tag                                                     | Kan <sup>R</sup>                  | Novagen            |
| pWSK29                     | Constitutive expression plasmid                                                                     | pSC101/Amp <sup>R</sup>           | (8)                |
| pZE12Luc                   | P <sub>LlacO</sub> promoter; constitutive expression plasmid                                        | ColE1/Amp <sup>R</sup>            | (9)                |
| pISVA-001                  | pZE12luc derivative; P <sub>LlacO</sub> promoter; constitutive plasmid expressing SraL              | ColE1/Amp <sup>R</sup>            | (4)                |
| pISVA-004                  | pET-28a encoding His-Rho protein                                                                    | Kan <sup>R</sup>                  | This study         |
| pISVA-005                  | pWSK29 derivative; constitutive plasmid expressing ProQ                                             | pSC101/Amp <sup>R</sup>           | This study         |
| pBAD-MS2                   | pBAD24 + MS2 aptamer; arabinose inducible plasmid                                                   | pBR322/Amp <sup>R</sup>           | (10)               |
| pBR- <i>plac</i>           | P <sub>LlacO</sub> promoter expression vector                                                       | pBR322/Amp <sup>R</sup>           | (11)               |
| pBR- <i>plac2</i>          | P <sub>LlacO</sub> promoter expression vector                                                       | pBR322/Amp <sup>R</sup>           | This study         |
| pBR- <i>plac2-sraL</i>     | P <sub>LlacO</sub> promoter expression vector; plasmid expressing SraL; IPTG inducible promoter     | pBR322/Amp <sup>R</sup>           | This study         |
| pBR- <i>plac2 MS2</i>      | P <sub>LlacO</sub> promoter expression vector                                                       | pBR322/Amp <sup>R</sup>           | This study         |
| pBR- <i>plac2 MS2-sraL</i> | P <sub>LlacO</sub> promoter expression vector; plasmid expressing MS2-SraL; IPTG inducible promoter | pBR322/Amp <sup>R</sup>           | This study         |
| pSVA-6                     | pWSK29 derivative; constitutive plasmid expressing Hfq                                              | pSC101/Amp <sup>R</sup>           | (12)               |

## Supplementary Materials and Methods

### *Bacterial strains and plasmids*

The chromosomal point mutants in *rho* (CMA-660) and *sraL* (CMA-661) were obtained by a multiple-step PCR process. The strain CMA-659 was constructed by inserting a Cm<sup>R</sup> cassette 89 nucleotides upstream of *rho* transcription start site, in the intergenic region between *rho* and its upstream gene *trxA*. The Cm<sup>R</sup> was amplified from plasmid pKD3 using the primers pair pIS-041/pIS-042. The resulting PCR product was integrated into SL1344 wild-type chromosome using the  $\lambda$ -red recombinase method (7). Subsequently, DNA fragments containing the Cm<sup>R</sup> cassette and the nucleotides substitutions in *rho* were prepared using two primers pairs pIS-043/pIS-045 and pIS-044/pIS-046 and using CMA-659 genomic DNA as template. In the case of *sraL*, the DNA fragments were prepared using the primers pairs pIS-027/pIS-048 and pIS-047/pIS-030 and the previously constructed CMA-654 (4) genomic DNA as template. The two resulting DNA fragments of each gene were mixed and used as PCR templates to obtain a DNA fragment containing Cm<sup>R</sup> cassette and the nucleotides substitutions using the primers pair pIS-043/pIS-046 for *rho* and pIS-027/pIS-030 for *sraL*. The resulting DNA fragments were purified and integrated into SL1344 by the  $\lambda$ -red recombinase method (7). The mutants were subsequently transferred to a fresh genetic background (SL1344 strain) by P22 HT105/1 int-201 transduction (13). The presence of the expected substitutions was confirmed by DNA sequencing (STAB Vida, Portugal). The strains CMA-662 and CMA-665 were obtained by eliminating chloramphenicol resistance gene from strains CMA-661 and CMA-651, respectively, using plasmid pCP20 (7). The double mutants (CMA-663 and CMA-666) were constructed using P22 HT105/1 int-201 transduction method (13).



*proQ* null mutant (CMA-664) was also constructed using the  $\lambda$ -red recombinase method (7) using the primer pair pIS-068/pIS-069. Chloramphenicol-resistance cassette of plasmid pKD3 replaces nucleotides -56 to +439 of *proQ* gene. Gene deletion was confirmed by colony PCR with primer pair pIS-070/pIS-071.

The pBR-*plac2-sraL* plasmid was constructed as follow. The multi-cloning site of the pBR-*plac* (11) was modified to introduce new endoribonuclease cleavage sites (XhoI, SmaI, SacI) by annealing oligonucleotides EM2888 and EM2889 and cloned into pBR-*plac* AatII/EcoRI-digested. The resulting plasmid was called pBR-*plac2*. The *sraL* gene was PCR-amplified from *Salmonella* Typhimurium SL1344 with primers EM2886 and EM2885. PCR product was then digested with XhoI and HindIII and inserted in pBR-*plac2* cut with the same enzymes to generate the pBR-*plac2-sraL* plasmid. Note: *sraL* was not cloned directly at the +1 of the pBR-*plac2* plasmid due to the presence of an AatII cleavage site in its sequence.

The plasmid pBR-*plac2 MS2-sraL* was constructed as follow. Plasmid pBR-*plac2 MS2* was generated using a PCR reaction from the plasmid pBAD-*MS2* (14) with the following oligonucleotides, EM2883 and EM1724. The PCR product was digested with appropriate restriction enzymes and ligated into an equivalently digested pBR-*plac2*. Plasmid pBR-*plac2 MS2-sraL* was generated using a PCR reaction with EM2884 and EM2885 with *Salmonella* Typhimurium SL1344 genomic DNA as matrix. The PCR product and plasmid pBR-*plac2 MS2* were then digested with EcoRI and HindIII and ligated. In this construct, *MS2* aptamer was fused to the 5'-end of *SraL*.

To overexpress *Salmonella* Rho protein, SL1344 *rho* coding region was amplified with primer pair pIS-058/pIS-059. The purified PCR product was digested with NdeI and

HindIII and ligated to the pET-28a plasmid previously digested with the same enzymes, giving rise to pISVA-004. The plasmid was first transformed into *E. coli* DH5 $\alpha$  and was subsequently cloned into BL21(DE3) strain.

To obtain pISVA-005 plasmid expressing ProQ, the entire *proQ* sequence was amplified from SL1344 chromosome using the primer pair pIS-072/pIS-073. The resultant PCR fragment was digested with XbaI and HindIII and ligated into pWSK29 plasmid previously digested with the same enzymes.

All these constructs were verified by sequencing.

### ***MS2-affinity purification coupled with RNA sequencing***

*Salmonella* Typhimurium SL1344 strains were grown in LB medium at 37°C (100 mL). Cells were harvested in (A) exponential phase after anaerobic shock and in (B) late stationary phase. MAPS was performed as previously described in (14, 15). Briefly, the expression of MS2-*sraL* (or *sraL* control) was induced by addition of 1 mM IPTG for 10 minutes. Then, harvested cells were chilled for 20 minutes on ice. Cells were then centrifuged, resuspended in 1 mL of buffer A (20 mM Tris-HCl at pH 8.0, 150 mM KCl, 1 mM MgCl<sub>2</sub>, 1 mM DTT). Cells were then transferred to screw cap tubes containing 200  $\mu$ L of glass beads (0.1 mm bead diameter; BioSpec). Cells were disrupted using Precellys®24 Homogenizer (three cycles: 6500 rpm for 20 seconds, followed by 1 minute on ice; Bertin). The lysate was centrifuged at 17,000g for 30 minutes at 4°C and the supernatant was applied to the column for affinity purification. MS2-affinity purification was performed as previously described (15). Both lysates were applied on the same column (200 pmol of the MS2-MBP protein immobilized on an amylose resin). Afterward, RNA samples (output) were treated with TURBO™DNase (Ambion). cDNA libraries were

prepared with ScriptSeq™ v3 RNA-Seq Library Preparation Kit (Illumina) and sequenced (MiSeq sequencing system; Illumina). We used Galaxy Project (16) to analyze data. The whole list of genes enriched is available in Supplementary Dataset S1. The GEO accession number is GSE108234.

### ***In vitro transcription termination assays***

DNA templates for the *in vitro* transcription assays were prepared by PCR using genomic DNA from SL1344 wild-type strains for the wild-type transcripts, and the chromosomal DNA from the CMA-660 for the *rho*MUT transcript, and the following primer pairs: pIS-060/pIS-061 and pIS-062/pIS-061 for *rho*WT; pIS-063/pIS-064 for *sraL*; and pIS-066/pIS-067 for *dsrA*. *In vitro* transcription using T7 RNA polymerase and “riboprobe *in vitro* transcription system” (Promega) was performed to obtain *sraL* and *dsrA* transcripts. The transcripts were then purified by electrophoresis on an 8.3 M urea / 8% polyacrylamide gel, identified by ethidium bromide staining, and cut out from the gel. The RNA was eluted (3 M ammonium acetate at pH 5.2, 1 mM EDTA, 2.5% [v/v] phenol at pH 4.3) overnight at room temperature. The RNA was ethanol precipitated and resuspended in RNase free water. Transcription termination experiments were performed as described previously (17). Briefly, DNA template (5 nM; *rho*WT or *rho*MUT), *E. coli* RNA polymerase (0.0135 U/μl; New English Biolabs), Rho (0 nM or 70 nM, hexamer concentration) and RNasin (0,4 U/μl; Promega) were mixed in transcription buffer (40 mM Tris-HCl pH 8, 5 mM MgCl<sub>2</sub>, 1.5 mM DTT, 0.05 mg/ml BSA and 100 mM KCl). After 10 min at 37°C, the indicated sRNAs (*SraL*, *DsrA* or Anti) were added at a final concentration of 0.433 μM. After addition of transcription initiation mixture (0.2 mM rATP, 0.2 mM rCTP, 0.2 mM rGTP, 0.02 mM rUTP, 0.2 μCi/μl of <sup>32</sup>P-αUTP, 25 μg/ml rifampicin in transcription buffer) the samples

were incubated for 20 min at 37°C. Each reaction was stopped with 4 µl of EDTA (0.5 M pH 7.5), 2 µl of Yeast tRNA (0.25 mg/ml; Invitrogen) and 10 µl of sodium acetate (3 M pH 5.2), and subjected to phenol-chloroform extraction and ethanol precipitation as described (17). Reaction pellets were dissolved in resuspension buffer (10 mM MOPS, 1 mM EDTA, pH 7.5), mixed with RNA loading buffer (95% [v/v] formamide, 0.1% [w/v] xylene cyanol, 0.1% [w/v] bromophenol blue, 10 mM EDTA) and analysed by denaturing 8.3 M urea / 6% polyacrylamide gel electrophoresis.

### ***β-Galactosidase activity assays***

β-Galactosidase activity was assayed as previously described by Miller (18), with some modifications. Bacterial cells in middle exponential phase (OD<sub>600</sub> of 1), stationary phase (OD<sub>600</sub> of 2 plus 6 h) and upon anaerobic shock were harvested and resuspended in Buffer 1 (60 mM Na<sub>2</sub>HPO<sub>4</sub>·7H<sub>2</sub>O, 40 mM NaH<sub>2</sub>PO<sub>4</sub>·H<sub>2</sub>O, 10 mM KCl, 1 mM MgSO<sub>4</sub>, and 50 mM β-mercaptoethanol, pH 7). The optical density at 600 nm was determined and a specific volume of cells was used to assess LacZ expression using *o*-nitrophenyl- β-D-galactopyranoside (ONPG; Sigma) as substrate. The reaction was stopped with 1 M of Na<sub>2</sub>CO<sub>3</sub> when the suspension reached a light-yellow color. OD<sub>420</sub> and OD<sub>500</sub> were measured and β-Galactosidase activity expressed in Miller Units. Paired t-test statistical analysis was carried out using GraphPad Prism 6 software.

## References

1. Busch A, Richter AS, & Backofen R (2008) IntaRNA: efficient prediction of bacterial sRNA targets incorporating target site accessibility and seed regions. *Bioinformatics* 24(24):2849-2856.
2. Rehmsmeier M, Steffen P, Hochsmann M, & Giegerich R (2004) Fast and effective prediction of microRNA/target duplexes. *RNA* 10(10):1507-1517.
3. Hoiseh SK & Stocker BA (1981) Aromatic-dependent *Salmonella typhimurium* are non-virulent and effective as live vaccines. *Nature* 291(5812):238-239.
4. Silva IJ, Ortega AD, Viegas SC, Garcia-Del Portillo F, & Arraiano CM (2013) An RpoS-dependent sRNA regulates the expression of a chaperone involved in protein folding. *RNA* 19(9):1253-1265.
5. Sittka A, Pfeiffer V, Tedin K, & Vogel J (2007) The RNA chaperone Hfq is essential for the virulence of *Salmonella typhimurium*. *Molecular microbiology* 63(1):193-217.
6. Figueroa-Bossi N, *et al.* (2014) RNA remodeling by bacterial global regulator CsrA promotes Rho-dependent transcription termination. *Genes & development* 28(11):1239-1251.
7. Datsenko KA & Wanner BL (2000) One-step inactivation of chromosomal genes in *Escherichia coli* K-12 using PCR products. *Proc Natl Acad Sci U S A* 97(12):6640-6645.
8. Wang RF & Kushner SR (1991) Construction of versatile low-copy-number vectors for cloning, sequencing and gene expression in *Escherichia coli*. *Gene* 100:195-199.

9. Lutz R & Bujard H (1997) Independent and tight regulation of transcriptional units in *Escherichia coli* via the LacR/O, the TetR/O and AraC/I1-I2 regulatory elements. *Nucleic Acids Res* 25(6):1203-1210.
10. Desnoyers G & Massé E (2012) Noncanonical repression of translation initiation through small RNA recruitment of the RNA chaperone Hfq. *Genes & development* 26(7):726-739.
11. Guillier M & Gottesman S (2006) Remodelling of the *Escherichia coli* outer membrane by two small regulatory RNAs. *Molecular microbiology* 59(1):231-247.
12. Viegas SC, Mil-Homens D, Fialho AM, & Arraiano CM (2013) The virulence of *Salmonella enterica* Serovar Typhimurium in the insect model *Galleria mellonella* is impaired by mutations in RNase E and RNase III. *Applied and environmental microbiology* 79(19):6124-6133.
13. Schmieger H (1971) The fate of the bacterial chromosome in P22-infected cells of *Salmonella typhimurium*. *Mol Gen Genet* 110(3):238-244.
14. Lalaouna D, *et al.* (2015) A 3' external transcribed spacer in a tRNA transcript acts as a sponge for small RNAs to prevent transcriptional noise. *Molecular cell* 58(3):393-405.
15. Lalaouna D, Prevost K, Eyraud A, & Masse E (2017) Identification of unknown RNA partners using MAPS. *Methods* 117:28-34.
16. Goecks J, Nekrutenko A, Taylor J, & Galaxy T (2010) Galaxy: a comprehensive approach for supporting accessible, reproducible, and transparent computational research in the life sciences. *Genome Biol* 11(8):R86.

17. Nadiras C, Schwartz A, Delaleau M, & Boudvillain M (2018) Evaluating the Effect of Small RNAs and Associated Chaperones on Rho-Dependent Termination of Transcription In Vitro. *Methods in molecular biology* 1737:99-118.
18. Miller JH (1972) *A short course in bacterial genetics: a laboratory manual and handbook for Escherichia coli and related bacteria.*

**Additional data table S1 (separate file)**

**Dataset S1** - Summary table of all enriched RNAs using MAPS in *sraL* background. Genes are named according to *Salmonella enterica* serovar Typhimurium SL1344 nomenclature (NCBI Genome Database NC\_016810.1). Reads were normalized by coverage. gene1\_gene2 represents the intergenic region between gene1 and gene2 (including 5' and 3'-UTR). The first entry corresponds to SraL; the previous described SraL target (trigger factor) and Rho are highlighted.
